# Supplementary material for: Steaming multiwalled carbon nanotubes via acid vapour for controllable nanoengineering and the fabrication of carbon nanoflutes
Source: Royal Society of Chemistry journal article supplement (doi:10.1039/c1cc10525f), 2011-01-01
Supplement: c1cc10525f.pdf [file c1cc10525f.pdf]

Supplementary Information for

**Steaming multiwalled carbon nanotubes via acid vapor for controllable  
nanoengineerings and the fabrication of carbon nanoflutes**

Jun Ming,<sup>a,b,c</sup> Yingqiang Wu,<sup>a,b,c</sup> Yancun Yu,<sup>a,b</sup> Fengyu Zhao<sup>a, b\*</sup>

*<sup>a</sup>State Key Laboratory of Electroanalytical Chemistry, Changchun Institute of Applied Chemistry, Chinese Academy of Sciences, Changchun 130022, P. R. China;*

*<sup>b</sup>Laboratory of Green Chemistry and Process, Changchun Institute of Applied Chemistry, Chinese Academy of Sciences, Changchun 130022, P. R. China;*

*<sup>c</sup>Graduate University of the Chinese Academy of Sciences, Beijing100049, P. R. China.*

## Materials

The multiwalled carbon nanotubes (MWCNTs) (length 5-15  $\mu\text{m}$ , diameter 40-60 nm, purity >98%) were purchased from Shenzhen Nanotech Port Co., Ltd. The concentrated  $\text{HNO}_3$  (65~68 wt.%) and  $\text{HCl}$  (36~38 wt.%) were purchased from Sinopharm Chemical Reagent Beijing Co. Ltd and used directly without any dilution. A sample of MWCNTs@amorphous carbon (50.68 wt.%) & metal (M = Fe, Ni, Co, total 16.97 wt.%) (Fig. S3A), synthesized by coating MWCNTs with a layer of amorphous carbon<sup>S1</sup> and loading the metal nanoparticles (Fe, Co, Ni)<sup>S2</sup>, was used to examine the capability of the present steaming strategy in removing the impurities of metal and/or amorphous carbon.

## Experimental procedure

A typical steaming procedure for surface functionalization of MWCNTs is as follows: 0.3 g pristine MWCNTs (p-MWCNTs) were loaded on the porous  $\text{SiO}_2$  griddle of glass steamer (Fig. S1A) and then placed into a 50 mL Teflon-vessel (Fig. S1B), at the bottom of which 0.15-3 mL  $\text{HNO}_3$  was added previously. Subsequently, the Teflon vessel was sealed in the autoclave and then moved to the oven for steaming at the temperature of 120-200  $^\circ\text{C}$  within 5 h (Fig. S1, C to E). After the steaming treatment, cooled down the autoclave to the room temperature and took the steamer out of the Teflon vessel into a clean beaker, in which washed the functionalized MWCNTs (f-MWCNTs) with distilled water and ethanol by *in-situ* filtration (Fig. S1F). Finally, the steamer was transferred to the oven for drying (60  $^\circ\text{C}$ ) and the formed solid black cakes (f-MWCNTs, inset of Fig. S1F) could be collected easily and completely.

Normal surface functionalization, short-cut, end-open, production of carbon nanoflutes, removal of amorphous carbon and some metal catalysts that could not react with HCl, should be treated by HNO<sub>3</sub>. Alternatively, the HCl was used for removing most transitional metal impurities or catalysts.

**References:**

- s1 Y. Wan, Y. L. Min and S. H. Yu, *Langmuir* 2008, **24**, 5024-5028.
- s2 X. Meng, H. Cheng, Y. Akiyama, Y. Hao, W. Qiao, Y. Yu, F. Zhao, S. Fujita and M. Arai, *J. Catal.* 2009, **264**, 1-10.

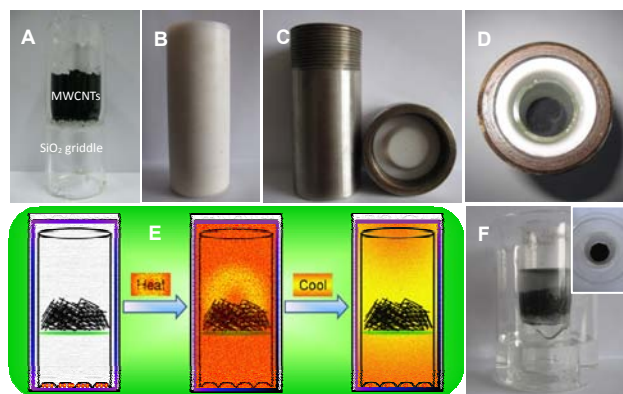

**Fig. S1** (A) The photograph of glass steamer and the placement of MWCNTs. (B) The Teflon vessel (50 mL). (C) The stainless steel autoclave with a cover padded by Teflon. (D) The situation of equipments (E) The schematic procedure of the steaming process. (F) The washing and separation of f-MWCNTs through filtration *in-situ* in the glass steamer.

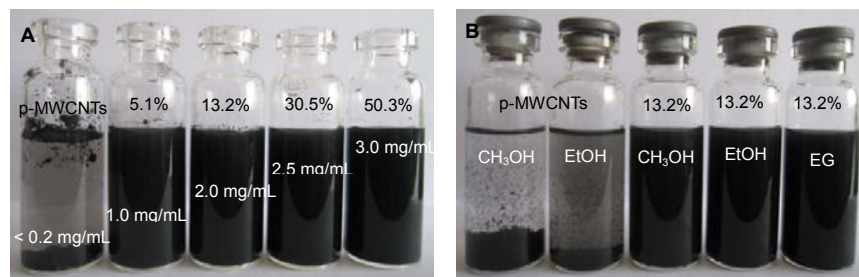

**Fig. S2** The dispersion ability of p-MWCNTs and f-MWCNTs with different weight losses in water (A) and in organic solvents (B), ethylene glycol (EG).

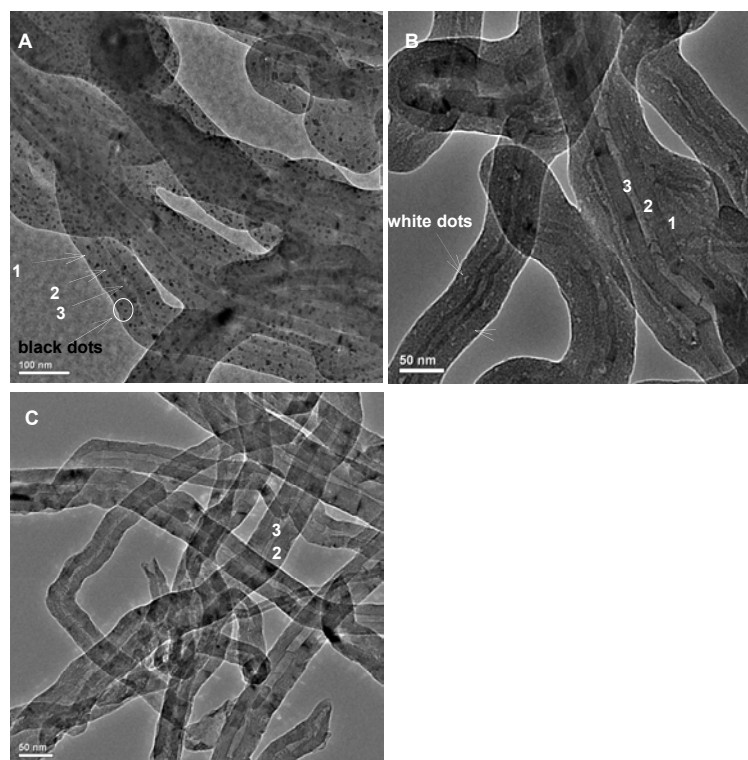

**Fig. S3** (A) MWCNTs@amorphous carbon (50.68 wt.%) & metal (M = Fe, Ni, Co, total 16.97 wt.%), (B) MWCNTs@amorphous carbon obtained after selectively removed the metal impurities by steaming with HCl, (C) MWCNTs obtained after simultaneously removed the metal impurities and amorphous carbon by streaming with HNO<sub>3</sub>. 1-amorphous carbon, 2-the multi-walls of MWCNTs, 3-the hollow tubes of CNTs.

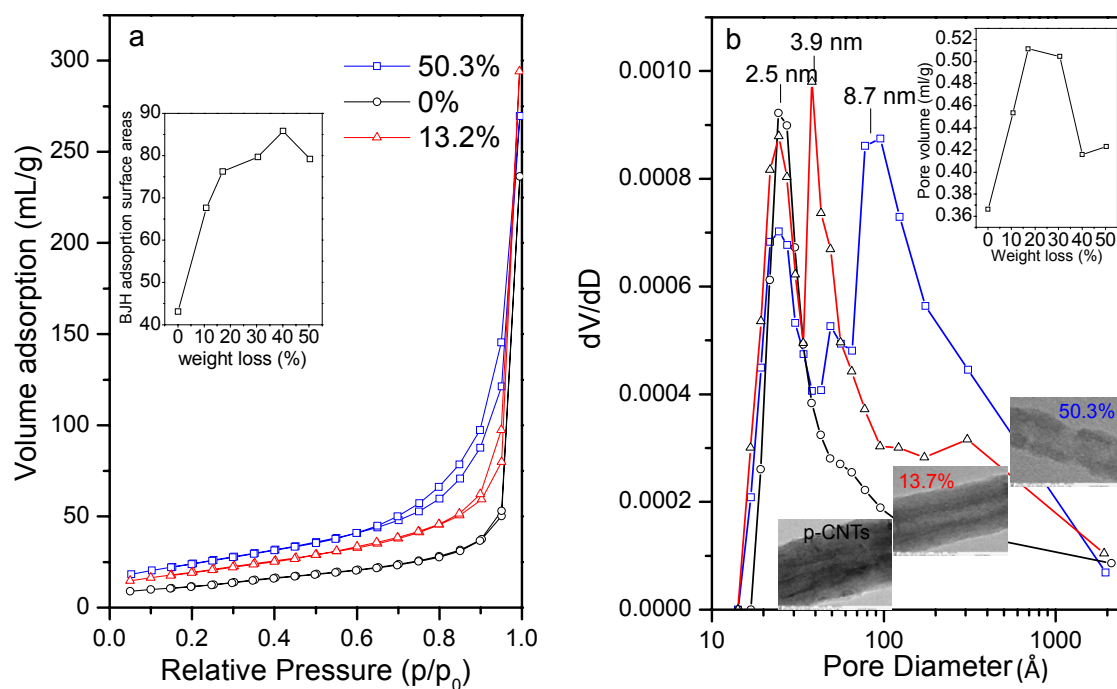

**Fig. S4** (a) Nitrogen adsorption isotherms of the p-MWCNTs and f-MWCNTs with different weight losses. Inset figure is the changing relations between the weight losses and the specific surface area of f-MWCNTs. (b) The pore size distribution of p-MWCNTs and f-MWCNTs. Upper inset figure is the changing relations between the weight loss and the pore volume of f-MWCNTs, below inset figures are TEM mages of p-MWCNTs and f-MWCNTs with varied weight losses.
